# Supplementary material for: Feasibility of robust estimates of ozone production rates using satellite observations
Source: Copernicus journal article supplement (doi:10.5194/egusphere-2024-1947), 2024-07-26
Supplement: Supplementary file [file egusphere-2024-1947-AC3-supplement.pdf]

## Main Comments:

The authors develop a powerful parameterization of ozone production rate using satellite-derived columns of NO<sub>2</sub> and HCHO along with modeled photolysis rates. Overall, an excellent, important, manuscript, although it can be difficult to follow at times.

**We thank this reviewer for their constructive comments. Our response is as follows:**

L206: At the beginning of the methods section, add a few sentences explaining how sections 3.1-3.4 fit together.

### Response

**We added a few sentences to describe the sections.**

### Modifications

“In this section, we begin by discussing a robust regression model specifically developed for feature selection in the parameterization of PO<sub>3</sub>. We then describe the training dataset created for this purpose. Following that, we introduce a clustering technique utilized to organize the training data, which enables us to identify the key drivers of PO<sub>3</sub> variability. Finally, we provide a comprehensive overview of the PO<sub>3</sub> estimates algorithm by integrating data from the TROPOMI retrievals, ground-based remote sensing, and various models.”

L274-L296: How does the clustering described in section 3.3 fit into the rest of the paper? Is it part of the coefficient determination or just an analysis tool. Please explain more clearly.

### Response

**The clustering algorithm was an auxiliary tool to pinpoint the major drivers of PO<sub>3</sub> variability as well as to show that a wide range of atmospheric conditions has been covered in our study.**

### Modifications

**We modified the section by starting:**

“The aim of using a classifier to group the large quantity and types of aircraft data into similar features is to allow us to study the primary contributors to PO<sub>3</sub> under different chemical, solar, and meteorological conditions. Additionally, this approach will help us understand the range of atmospheric conditions included in the training dataset.”

L400: How did you end up with 7 distinct classes after your clustering analysis? Was it trial and error based on how the deviations of observations from the centroids of the 11 features looked?

### Response

**While some statistical tools (such as the silhouette metric) can help find the optimum number of classes, we found the number of classes sufficient to explain their distinctive characteristics with respect to solar radiation, FNR, FNP, and altitude. Almost every class has a unique feature, allowing us to explain their differences quickly.**

L524-543. It appears that you adjust the TROPOMI NO<sub>2</sub> and HCHO to remove biases with respect to MAX-DOAS and FTIR observations. How important is this result to your bottom line coefficients for PO<sub>3</sub> and wouldn't these biases be regional and subject to change with new versions of TROPOMI data?

### Response

**Thanks for the comment; the coefficients determined for the PO<sub>3</sub> parametrization rely only on the training dataset obtained from the observationally-constrained F0AM model. They do not depend on the satellite dataset. What can change that coefficient is the inclusion of a new air**

quality campaign or different configurations in F0AM. The statistics we gain from TROPOMI errors can change with new updates to the retrieval algorithm or new benchmarks; however, as far as we know, the present work is the most comprehensive validation of the most recent TROPOMI dataset. It is also important to recognize that some biases associated with these data are systematic and do not change drastically from a specific version of the product to another. For instance, the large underestimation of both HCHO and NO<sub>2</sub> columns has been widely recognized in literature based on various subsets of ground-based remote sensing measurements (please see Table 1 in <https://acp.copernicus.org/articles/21/18227/2021/>).

#### Minor Comments

L93 Break this paragraph into two with the last paragraph previewing what you are doing in this manuscript.

#### Response

**Thanks, we divided them into two pieces.**

L127: Is there a version number for these recently reprocessed fields?

#### Response

**Yes, we added it.**

#### Modifications

We use the recently reprocessed daily level-2 (L2) TROPOMI tropospheric NO<sub>2</sub> and total HCHO columns (v2.4) derived from UV-visible radiances onboard the European Space Agency's (ESA's) Sentinel-5 Precursor (S5P) spacecraft (~328-496 nm).

L199-200: I don't understand the meanings of the colons within the parentheses. Are these threshold values for the look up tables? If yes, why do the values jump around so much such as 100:50:600?

#### Response

**Sorry for the confusion! The first and the last numbers are the boundaries and the middle number is the interval.**

#### Modifications

**We modified the sentence to:** "This look-up table is based on the calculation of more than 20,064 solar spectra over a wide range of solar zenith angle (SZA) (the range [0, 90] in steps of 5°), altitude (the range [0, 15] in steps of 1 km), overhead total ozone column (the range [100, 600] in steps of 50 DU), and surface UV albedo (the range [0, 1] in steps of 0.2) using NCAR's Tropospheric Ultraviolet and Visible radiation model (TUV v5.2) and cross sections and quantum yields from IUPAC and JPL (Wolfe et al., 2016)."

L268: Do you really mean equation 3 here?

#### Response

**Corrected.**

Figure 2. Perhaps italicize SZA, ambient temperature, and Pressure as they are dropped?

#### Response

**Done.**

Figure 2: Why is the left column labeled “Input Candidates from Aircraft” when it uses model and satellite data?

**Response**

**The inputs for the parametrization (i.e., training data set) come from the F0AM model constrained by aircraft dataset. For the prediction (the right part of the flowchart) we use satellites and models.**

L325: M2GMI (be sure to define somewhere)

**Response**

**Defined.**

L359-L364: Here or perhaps in section 3.2, Add some background on the role dilution factors play in box model calculations.

**Response**

**Thanks, we had already dedicated few sentences to talk about the role of dilution factor:**  
*...As a result, we have simplified the physical loss by employing a first-order dilution rate set to  $1/86400$  s<sup>-1</sup>, equivalent to a lifetime of 24 hours. This approach ensures that unconstrained trace gases that take longer to break down do not accumulate over time. Exact knowledge of dilution factors requires knowing molecular and turbulent diffusion, entrainment and detrainment, and deposition rates, all of which are unknown at the micro-scale level of aircraft observations. Nonetheless, studies of Brune et al. (2022) and Souri et al. (2023) showed that HO<sub>2</sub>, OH, NO<sub>x</sub>, and HCHO are relatively immune to the choice of the dilution factor, whereas RO<sub>2</sub> mixing ratios can depart introducing some biases in PO<sub>3</sub> estimates....*

L391-397: The last 3 sentences of the Figure 3 caption contain information that is also in the main body of the article. Perhaps delete. You probably should mention which field campaigns had the most observations and therefore played the largest role in determining the statistics.

**Response**

**Removed.**

Figure 4: I notice you use log(FNR) and log(FNP) here. Could you explain the benefits of this transformation.

**Response**

**Both FNRs and FNP can have extremely large values making it more difficult to put both low and high values in the same plot. Therefore, the use of log() was helpful to have all of them on the same plot with minimal spaces.**

**Modifications**

**We added the following sentence to Figure 4:**  
*“Both FNR and FNP are scaled using the logarithmic function to enable the simultaneous visualization of low and high values within a single plot.”*

L449-451. Did ambient T, H<sub>2</sub>O vapor, pressure and/or SZA add any additional insights? Preview the results here.

**Response**

H<sub>2</sub>O is known to influence ozone through O<sub>1</sub>D+H<sub>2</sub>O->2OH, and many chemical reactions rely on temperature and pressure. As mentioned in the paper, we can't say if they add new information based on the clustering algorithm. Still, we decided to include them in the LASSO estimate so the L1-regularization could determine if they are helpful at better predicting PO<sub>3</sub>. The LASSO algorithm didn't consider them for several reasons: i) we think there is a strong correlation between HCHO and temperature, so HCHO data already have temperature information included; ii) SZA and photolysis rates are highly correlated; and iii) H<sub>2</sub>O has non-linear effect on PO<sub>3</sub> due to generation of 2OH molecules (please see <https://agupubs.onlinelibrary.wiley.com/doi/full/10.1029/2019GL084486>) ; since we did not separate the regression into different humid regions, the LASSO algorithm was unable to use H<sub>2</sub>O in a linear form. This is an inherent limitation of the LASSO algorithm, and for this reason, we had mentioned in the conclusion that we may need to explore the capabilities of a more sophisticated algorithm (i.e., deep neural network) to consider all non-linearities without having to linearize the problem using various ozone indicators.

L467-469: Earlier you mention that SZA, pressure, and temperature were dropped. Here you also include H<sub>2</sub>O vapor.

**Response**

**Thanks for noticing this! We added water vapor to the text.**

L621: Be sure to expand the Benelux acronym the first time it is introduced.

**Response**

**Added.**

Figure 17. You may want to change the order of the contributions so that the third listed contribution in the legend (jNo<sub>2</sub>) is also the third in the Figure (it is currently the second from the top).

**Response**

**The legend follows the order of the “area” function in MATLAB starting from the bottom to the top part of the charts. So we decided to leave it as is.**

L756-773: The financial support section lists numerous measurements some of which seem to have little relation to this project. Would it be possible to tighten this section up by eliminating data sets that are only peripherally related to this study while adding more information on how particular measurements were important for this study.

**Response**

**While we fully understand the reviewer's concern, it is mandatory for us to include all FTIR and MAX-DOAS contributions in the acknowledgment. It is part of their terms of use. The correction factors derived from these datasets had a significant effect on our results because the slopes were far from one.**

**Grammatical Comments:**

L96: use degrees symbol.

**Response**

**Corrected.**

Section 2.4. .... But how do you convert the VCDS?

**Response**

**Thanks, we added the equation.**

**Modifications**

To carry out the conversion, we apply the following conversion factor ( $\gamma$ ) to the TROPOMI VCDs:

$$\gamma = \frac{\bar{q}_{PBLH}}{\frac{NA}{g \times M_{air}} \sum q dp} \quad (4)$$

where  $\bar{q}_{PBLH}$  is the average of the target trace gas mixing ratios in the PBLH,  $g$  is the acceleration of the gravity (assumed  $9.81 \text{ m/s}^2$ ),  $NA$  is the Avogadro constant,  $M_{air}$  is the air molecular weight (assumed  $28.96 \text{ g/mol}$ ),  $q$  is the target trace gas mixing ratio at a given altitude, and  $dp$  is the thickness of each model vertical grid box in hPa. The denominator in Eq. 4 represents the modeled VCD. We integrate modeled partial VCDs up to top of the atmosphere for HCHO, and up to the tropopause pressure layer for  $\text{NO}_2$ .

L197: To estimate photolysis rates of JNO2 and JO1d- $\diamond$  To estimate the photolysis rates, JNO2 and JO1d), we

**Response**

**Corrected.**

L216: --> (Tibshirani, 1996). They consider a regression,

**Response**

**Corrected.**

L292: These features include --> These features are

**Response**

**Corrected.**

L317: are based on converted the bias-corrected --> are derived by converting the bias-corrected

**Response**

**Corrected.**

Figure 2: Typo. Should be M2GMI Conversion Factor within the diamond.

**Response**

**Thanks for noticing this! Fixed.**

L480: more photolysis rates --> higher photolysis rates

**Response**

**Corrected.**

L487: by random dropping --> by randomly dropping

**Response**

**Corrected.**

L513: predictor power --> predictive power

**Response**

**Corrected.**

L596: making NO<sub>2</sub> levels --> meaning NO<sub>2</sub> levels

**Response**

**Corrected.**

L686: maps of within the PBL --> PBL maps

**Response**

**We fixed this sentence.**

**Modifications**

“In this study, we generated **PO<sub>3</sub> maps within** the planetary boundary layer (PBL), constrained by bias-corrected TROPOspheric Monitoring Instrument (TROPOMI) observations, using a piecewise regularized regression model.”
